# Supplementary material
Source: publisher site journal article supplement (https://www.dovepress.com/article/561571)
Supplement: Supplementary file 1 [file supplemental%20information-revised.docx]

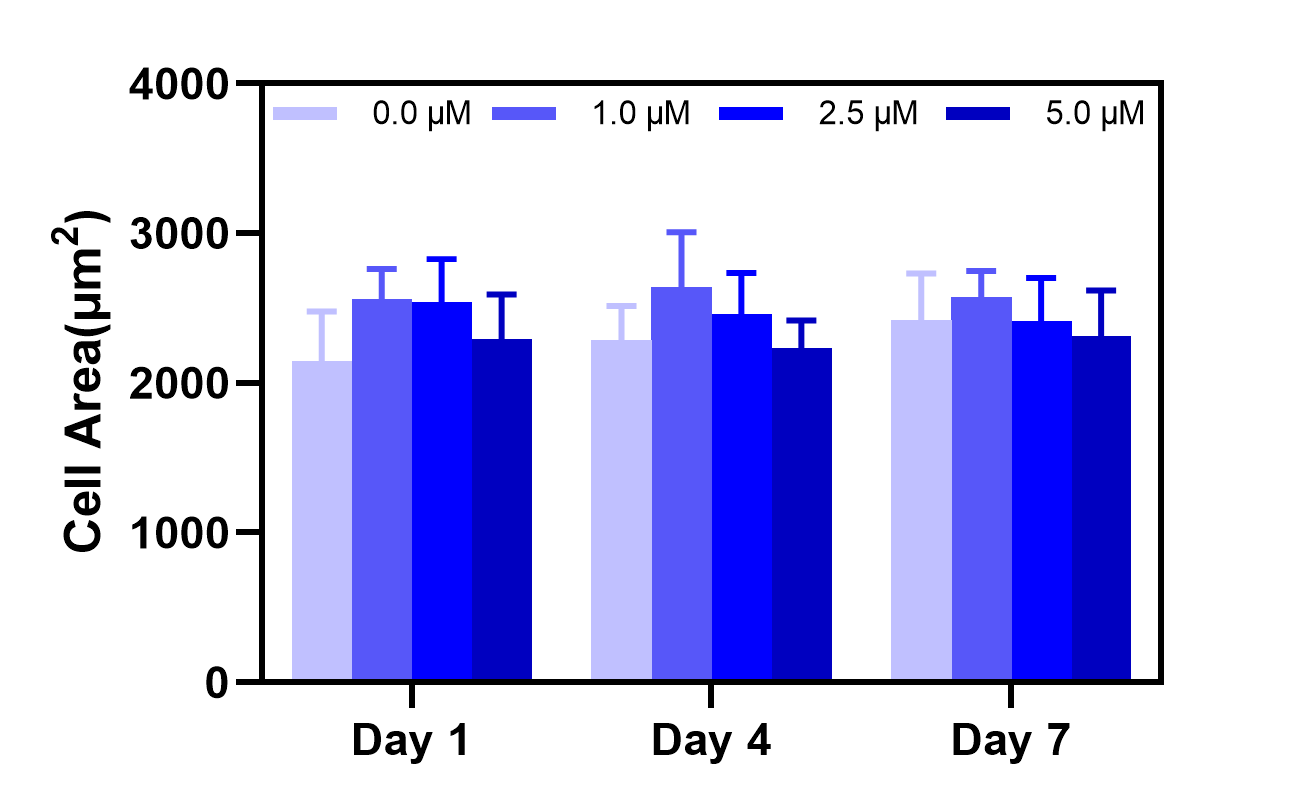


**Figure S1.** Quantitative analysis of cell morphology of BMSCs with PJ34 of different concentration in vitro. Data are means±SD (n=5 each group).


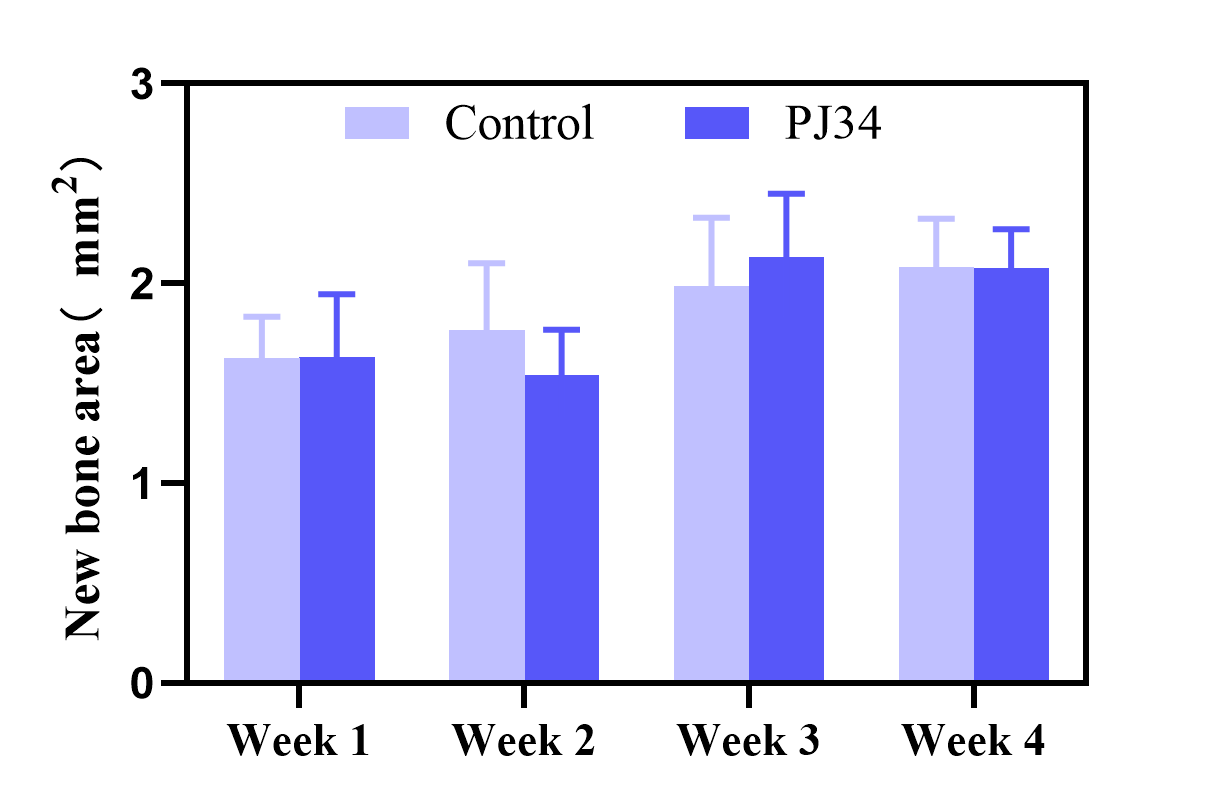


**Figure S2.** Quantitative analysis of effect of PJ34 on new bone tissues stained by HE in tibia fracture model at 1, 2, 3, and 4 weeks. Data are means±SD (n=5 each group).
